# Supplementary material for: PEG conjugated BODIPY-Br2 as macro-photosensitizer for efficient imaging-guided photodynamic therapy
Source: Royal Society of Chemistry journal article supplement (doi:10.1039/c7tb02924a), 2018-01-01
Supplement: c7tb02924a1.pdf [file c7tb02924a1.pdf]

Supporting information for

## PEG Conjugated BODIPY-Br<sub>2</sub> as Macro-Photosensitizer for Efficient Imaging-guided Photodynamic Therapy

Zheng Ruan <sup>a</sup>, Yangyang Zhao <sup>b</sup>, Pan Yuan <sup>a</sup>, Le Liu <sup>a</sup>, Yucai Wang <sup>b,\*</sup> and

Lifeng Yan <sup>a,\*</sup>

<sup>a</sup>CAS Key Laboratory of Soft Matter Chemistry, Hefei National Laboratory for

Physical Sciences at the Microscale, and Department of Chemical Physics, iCHEM,

<sup>b</sup>School of Life Sciences, University of Science and Technology of China, Hefei,

230026, P.R.China.

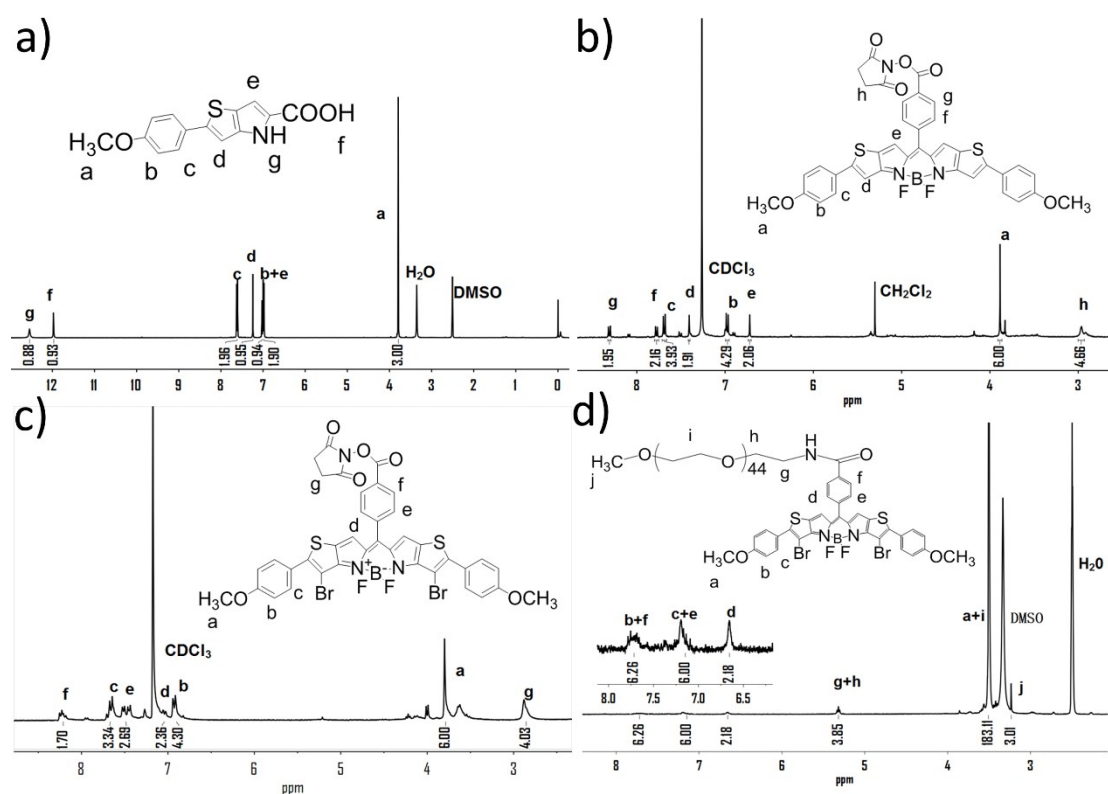

**Figure S1.** <sup>1</sup>H NMR spectra of 2-(4-Methoxyphenyl)-4H-thieno[3,2-b]pyrrole-5-carboxylic acid (compound 1, a), NHS-BDP (b), BDP-Br (c) and PEG-BDP (d).

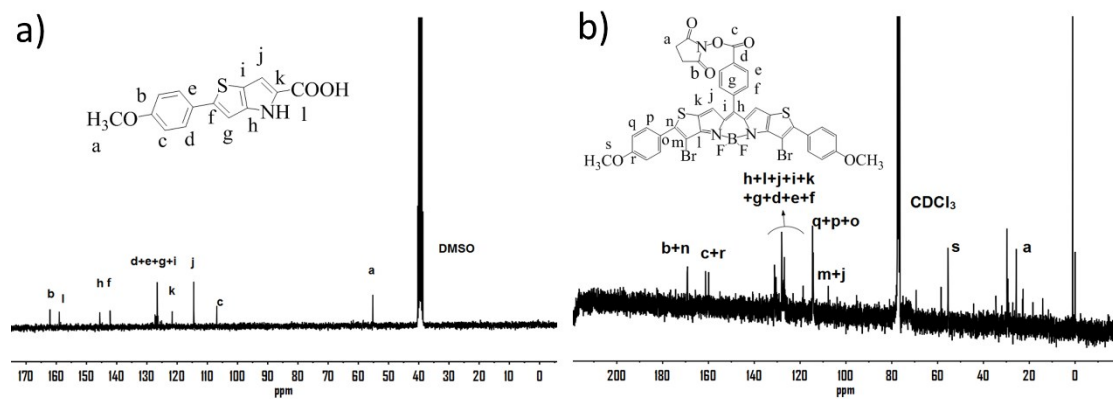

**Figure S2.**  $^{13}\text{C}$  NMR spectra of 2-(4-Methoxyphenyl)-4H-thieno[3,2-b]pyrrole-5-carboxylic acid (compound 1, a) and BDP-Br (b).

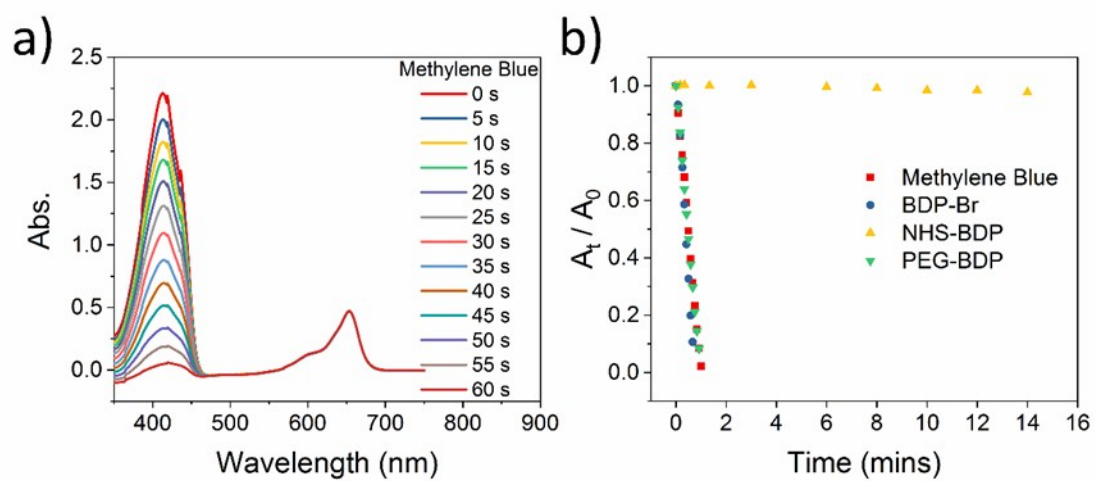

**Figure S3.** Absorbance decline of the reference compound methylene blue upon 660 nm laser irradiation (a). Comparison of the singlet oxygen ( $^1\text{O}_2$ ) generation abilities of each photosensitizer (b).

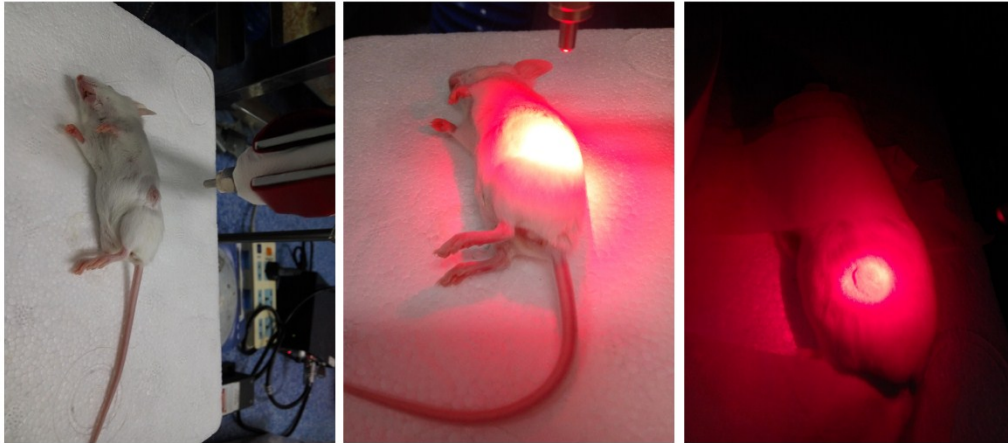

**Figure S4.** Photograph of laser treatment on 4T1 tumor model bearing BALB/c mice.

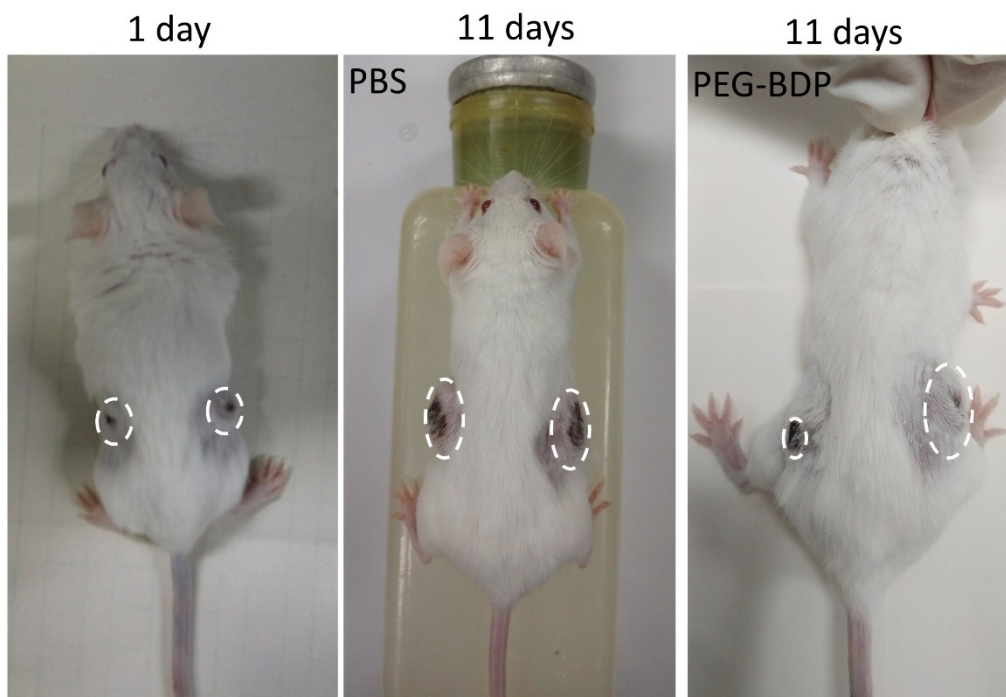

**Figure S5.** Images of tumor bearing mice in each group with different tumor volume after 11 days treatment.
